# Supplementary material
Source: PubMed Central journal article supplement (PMC2078383)
Supplement: oenvmed_oem.2006.032078_2.pdf [file oenvmed_oem.2006.032078_2.pdf]

**Table E2: Analysis of genetic factors by case-control status (PD cases only versus controls) after adjustment\***

|                                | Reference group  | Studied groups   | OR   | 95% CI       | p-value ** |
|--------------------------------|------------------|------------------|------|--------------|------------|
| <i>CYP2D6</i>                  | *1*1             | *1*4             | 0.93 | (0.77, 1.13) | p=0.34**   |
|                                |                  | *4*4             | 0.85 | (0.54, 1.32) |            |
| <i>PON1 L55M</i>               | <i>M/M</i>       | <i>L/M</i>       | 0.92 | (0.76, 1.10) | p=0.25**   |
|                                |                  | <i>L/L</i>       | 0.86 | (0.64, 1.16) |            |
| <i>PON1 Q192R</i>              | <i>Q/Q</i>       | <i>Q/R</i>       | 0.94 | (0.78, 1.34) | p=0.98**   |
|                                |                  | <i>R/R</i>       | 1.12 | (0.79, 1.58) |            |
| <i>GSTM1</i>                   | <i>Positive</i>  | <i>Null</i>      | 1.16 | (0.98, 1.39) | p=0.09     |
| <i>GSTT1</i>                   | <i>Positive</i>  | <i>Null</i>      | 0.91 | (0.72, 1.16) | p=0.45     |
| <i>GSTM3</i>                   | <i>AA</i>        | <i>AB</i>        | 0.97 | (0.80, 1.18) | p=0.20**   |
|                                |                  | <i>BB</i>        | 0.53 | (0.27, 1.01) |            |
| <i>GSTP1</i> haplotype         | <i>AA</i>        | <i>AB/AC/AD</i>  | 0.92 | (0.76, 1.11) | p=0.95**   |
|                                |                  | <i>BB/BC/CC</i>  | 1.12 | (0.82, 1.52) |            |
| <i>NQO1</i>                    | *1*1             | *1*2             | 0.96 | (0.79, 1.16) | p=0.25**   |
|                                |                  | *2*2             | 0.68 | (0.40, 1.15) |            |
| <i>CYP1B1</i>                  | *1*1             | *1*3             | 0.98 | (0.80, 1.19) | p=0.98**   |
|                                |                  | *3*3             | 1.01 | (0.78, 1.31) |            |
| <i>MAO-A (males)</i>           | <i>T</i>         | <i>G</i>         | 1.22 | (0.93, 1.58) | p=0.15     |
| <i>MAO-A (females)</i>         | <i>TT</i>        | <i>TG</i>        | 1.04 | (0.79, 1.37) | p=0.66**   |
|                                |                  | <i>GG</i>        | 1.11 | (0.67, 1.79) |            |
| <i>MAO-B (males)</i>           | <i>A</i>         | <i>G</i>         | 1.16 | (0.91, 1.48) | p=0.23     |
| <i>MAO-B (females)</i>         | <i>AA</i>        | <i>AG</i>        | 1.11 | (0.82, 1.50) | p=0.67**   |
|                                |                  | <i>GG</i>        | 1.07 | (0.74, 1.55) |            |
| <i>SOD2 A16V</i>               | <i>AA</i>        | <i>AV</i>        | 0.98 | (0.79, 1.22) | p=0.72**   |
|                                |                  | <i>VV</i>        | 0.96 | (0.75, 1.22) |            |
| <i>EPHX3 Y113H<sup>2</sup></i> | <i>YY</i>        | <i>YH</i>        | 0.85 | (0.66, 1.01) | p=0.20**   |
|                                |                  | <i>HH</i>        | 0.84 | (0.58, 1.21) |            |
| <i>EPHX4 H139R</i>             | <i>HH</i>        | <i>HR</i>        | 0.99 | (0.82, 1.20) | p=0.51**   |
|                                |                  | <i>RR</i>        | 1.36 | (0.86, 2.16) |            |
| <i>DAT1</i>                    | <i>A/A</i>       | <i>A/G</i>       | 0.94 | (0.78, 1.12) | p=0.86**   |
|                                |                  | <i>G/G</i>       | 1.07 | (0.76, 1.52) |            |
| <i>DRD2A<sup>3</sup></i>       | <i>CC</i>        | <i>CT</i>        | 0.98 | (0.77, 1.25) | p=0.11**   |
|                                |                  | <i>TT</i>        | 1.53 | (1.06, 2.22) |            |
| <i>DRD2B<sup>1</sup></i>       | <i>B2B2</i>      | <i>B2B1</i>      | 0.96 | (0.77, 1.20) | p=0.88**   |
|                                |                  | <i>B1B1</i>      | 1.32 | (0.69, 2.50) |            |
| <i>NAT2</i>                    | <i>Fast/Fast</i> | <i>Fast/Slow</i> | 1.03 | (0.86, 1.25) | p=0.87**   |
|                                |                  | <i>Slow/Slow</i> | 0.93 | (0.68, 1.27) |            |

\* logistic regression adjusting for age, sex, country, ever used tobacco containing product, ever knocked unconscious and first degree family history of Parkinson's disease. MAO-A and MAO-B are not adjusted for sex but are presented for males and females separately.

\*\* For three category factors p-value for trend derived from logistic regression coding genetic factors as 0, 1 and 2 variable

<sup>1</sup> Malta excluded from analysis involving DRD2B

<sup>2</sup> Sweden and Italy excluded from analysis involving EPHX3

<sup>3</sup> Sweden and Malta excluded from analysis involving DRD2A
