# Supplementary material
Source: PubMed Central journal article supplement (PMC2078383)
Supplement: oenvmed_oem.2006.032078_3.pdf [file oenvmed_oem.2006.032078_3.pdf]

**Table E3: Analysis of gene-environment interactions (PD cases only versus controls) after adjustment\*.**

| Genetic polymorphisms       | Candidate genotype     | Exposure <sup>†</sup><br>Low vs High | Multiplicative interaction<br>Odds Ratio (95% CI) | p value |
|-----------------------------|------------------------|--------------------------------------|---------------------------------------------------|---------|
| <i>CYP2D6</i>               | *4*4                   | Solvents                             | 1.95 (0.43-8.88)                                  | 0.39    |
| <i>CYP1B1</i>               | *3*3                   | Solvents                             | 1.29 (0.53-3.15)                                  | 0.57    |
| <i>GSTM1</i>                | Null                   | Solvents                             | 2.34 (1.08-4.62)                                  | 0.03    |
| <i>GSTT1</i>                | Null                   | Solvents                             | 0.81 (0.32-2.00)                                  | 0.63    |
| <i>GSTM3</i>                | AB/BB                  | Solvents                             | 0.95 (0.43-2.07)                                  | 0.88    |
| <i>GSTP1</i> haplotype      | AB, AC, AD, BB, BC, CC | Solvents                             | 1.32 (0.65-2.66)                                  | 0.44    |
| <i>NQO1</i>                 | *1*2/*2*2              | Solvents                             | 0.68 (0.32-1.44)                                  | 0.31    |
| <i>SOD2 A<sub>16</sub>V</i> | AV                     | Solvents                             | 1.44 (0.56-3.73)                                  | 0.44**  |
|                             | VV                     | Solvents                             | 1.94 (0.70-5.34)                                  |         |
| <i>NAT2</i>                 | FS/SS                  | Solvents                             | 1.14 (0.56-2.29)                                  | 0.72    |
| <i>CYP2D6</i>               | *4*4                   | Pesticides                           | 1.33 (0.31-5.80)                                  | 0.70    |
| <i>PON1 L55M</i>            | LL/LM                  | Pesticides                           | 0.55 (0.24-1.30)                                  | 0.18    |
| <i>PON1 Q192R</i>           | QR/RR                  | Pesticides                           | 1.49 (0.64-3.45)                                  | 0.36    |
| <i>GSTM1</i>                | Null                   | Pesticides                           | 0.71 (0.31-1.65)                                  | 0.43    |
| <i>GSTT1</i>                | Null                   | Pesticides                           | 1.81 (0.58-5.63)                                  | 0.31    |
| <i>GSTM3</i>                | AB/BB                  | Pesticides                           | 1.08 (0.43-2.71)                                  | 0.87    |
| <i>GSTP1</i> haplotype      | AC/AD/BC/CC            | Pesticides                           | 3.01 (0.75-12.02)                                 | 0.12    |
| <i>NQO1</i>                 | *1*2/*2*2              | Pesticides                           | 1.09 (0.47-2.54)                                  | 0.84    |
| <i>CYP1B1</i>               | *3*3                   | Pesticides                           | 0.69 (0.21-2.32)                                  | 0.55    |
| <i>NAT2</i>                 | FS/SS                  | Pesticides                           | 0.67 (0.29-1.56)                                  | 0.35    |
| <i>GSTM1</i>                | Null                   | Iron                                 | 1.13 (0.54-2.33)                                  | 0.75    |
| <i>CYP1B1</i>               | *3*3                   | Iron                                 | 1.64 (0.63-4.27)                                  | 0.31    |
| <i>SOD2 A<sub>16</sub>V</i> | AV                     | Iron                                 | 0.69 (0.28-1.70)                                  | 0.71**  |
|                             | VV                     | Iron                                 | 0.72 (0.27-1.94)                                  |         |
| <i>NAT2</i>                 | FS/SS                  | Iron                                 | 0.77 (0.37-1.63)                                  | 0.51    |
| <i>SOD2 A<sub>16</sub>V</i> | AV                     | Copper                               | 0.89 (0.31-2.58)                                  | 0.46**  |
|                             | VV                     | Copper                               | 1.65 (0.51-5.34)                                  |         |
| <i>CYP2D6</i>               | *4*4                   | Manganese                            | 1.63 (0.35-7.62)                                  | 0.54    |
| <i>NQO1</i>                 | *1*2/*2*2              | Manganese                            | 1.06 (0.49-2.33)                                  | 0.88    |
| <i>CYP1B1</i>               | *3*3                   | Manganese                            | 1.93 (0.71-5.21)                                  | 0.20    |
| <i>SOD2</i>                 | AV                     | Manganese                            | 0.73 (0.27-1.93)                                  | 0.67**  |
|                             | VV                     | Manganese                            | 1.07 (0.38-3.01)                                  |         |

\* logistic regression adjusting for age, sex, country, ever used tobacco containing product, ever knocked unconscious and first degree family history of Parkinson's disease. MAO-A and MAO-B are not adjusted for sex but are presented for males and females separately.

\*\* For three category factors p-value for trend derived from logistic regression coding genetic factors as 0, 1 and 2 variable

† cut-offs for low /high exposure:

solvents/iron/manganese: 20% of an OEL (AAI)  
pesticides/copper: 2% of an OEL (AAI)

**Table E3: Analysis of gene-gene interactions (PD cases only versus controls) after adjustment\*.**

| Gene-gene interactions                                       |                                              | Multiplicative interaction<br>Odds Ratio (95% CI) | p value |
|--------------------------------------------------------------|----------------------------------------------|---------------------------------------------------|---------|
| <i>CYP2D6</i>                                                | <i>GSTM1</i>                                 | 0.86 (0.36-2.09)                                  | 0.86    |
| <i>PON55</i>                                                 | <i>GSTM1</i>                                 | 1.18 (0.82-1.68)                                  | 0.38    |
| <i>PON192</i>                                                | <i>GSTM1</i>                                 | 0.88 (0.62-1.26)                                  | 0.50    |
| <i>GSTT1</i>                                                 | <i>GSTM1</i>                                 | 1.35 (0.84-2.16)                                  | 0.22    |
| <i>GSTM3</i>                                                 | <i>GSTM1</i>                                 | 0.73 (0.49-1.10)                                  | 0.13    |
| <i>GSTP1</i> haplotype<br>AB/AC/AD vs. AA<br>BB/BC/CC vs. AA | <i>GSTM1</i><br>Null vs. Pos<br>Null vs. Pos | 0.73 (0.50-1.07)<br>1.02 (0.55-1.87)              | 0.23**  |
| <i>NQO1</i>                                                  | <i>GSTM1</i>                                 | 0.95 (0.66-1.37)                                  | 0.78    |
| <i>NAT2</i>                                                  | <i>GSTM1</i>                                 | 1.02 (0.72-1.46)                                  | 0.90    |
| <i>CYP2D6</i>                                                | <i>GSTT1</i>                                 | 1.62 (0.47-5.58)                                  | 0.44    |
| <i>GSTP1</i> haplotype<br>AB/AC/AD vs. AA<br>BB/BC/CC vs. AA | <i>GSTT1</i><br>Null vs. Pos<br>Null vs. Pos | 0.99 (0.59-1.63)<br>1.72 (0.77-3.83)              | 0.38**  |
| <i>MAO-B</i> (males only)                                    | <i>NQO1</i>                                  | 0.95 (0.58-1.57)                                  | 0.85    |
| <i>MAO-B</i> (females only)<br>AG vs. AA<br>GG vs. AA        | <i>NQO1</i>                                  | 0.97 (0.52-1.84)<br>0.85 (0.39-1.84)              | 0.91**  |
| <i>MAO-B</i> (males only)                                    | <i>DRD2A</i> <sup>2</sup>                    | 1.57 (0.55-4.51)                                  | 0.40    |
| <i>MAO-B</i> (females only)<br>AG vs. AA<br>GG vs. AA        | <i>DRD2A</i> <sup>2</sup>                    | 0.62 (0.18-1.97)<br>0.67 (0.16-2.81)              | 0.71**  |
| <i>MAO-B</i> (males only)                                    | <i>DRD2B</i> <sup>1</sup>                    | 0.59 (0.33-1.09)                                  | 0.09    |
| <i>MAO-B</i> (females only)<br>AG vs. AA<br>GG vs. AA        | <i>DRD2B</i> <sup>1</sup>                    | 0.97 (0.46-2.02)<br>0.64 (0.25-1.61)              | 0.58**  |

\* logistic regression adjusting for age, sex, country, ever used tobacco containing product, ever knocked unconscious and first degree family history of Parkinson's disease. MAO-A and MAO-B are not adjusted for sex but are presented for males and females separately.

\*\* For three category factors p-value for trend derived from logistic regression coding genetic factors as 0, 1 and 2 variable

<sup>1</sup> Excludes Malta

<sup>2</sup> Excludes Sweden and Malta.
